# Supplementary material for: Section-level relationships of North American Agalinis (Orobanchaceae) based on DNA sequence analysis of three chloroplast gene regions
Source: Springer Nature journal article supplement (doi:10.1186/1471-2148-4-15), 2004-06-08
Supplement: Additional file 2 [file 1471-2148-4-15-s2.pdf]

**Additional file 2 — Basic PCR Recipes (using Eppendorf MasterTaq PCR kit; Brinkman, Westbury, New York, USA) and PCR conditions**

*rbcL*

1x Recipe:

8.5  $\mu$ l H<sub>2</sub>O

2.5  $\mu$ l Buffer

2.5  $\mu$ l Taq Master (preheated to 65°C)

3.0  $\mu$ l Forward Primer (50 picomoles/ $\mu$ l)

3.0  $\mu$ l Reverse Primer (50 picomoles/ $\mu$ l)

1.0  $\mu$ l 25 mM MgCl<sub>2</sub>

1.0  $\mu$ l dNTPs

0.5  $\mu$ l Taq polymerase

3.0  $\mu$ l sample (~ 25 – 50 ng/ $\mu$ l)

PCR conditions for Full Length Template<sup>1</sup>:

1. 94°C 60 s
2. 46°C 90 s
3. 72°C 150 s
4. repeat steps 1 – 3 29 times
5. 72°C 15 min
6. 10°C until subsequent processing

*matK*

1x Recipe:

8.0  $\mu$ l H<sub>2</sub>O

2.5  $\mu$ l Buffer

2.5  $\mu$ l Taq Master (preheated to 65°C)

3.0  $\mu$ l Forward Primer (50 picomoles/ $\mu$ l)

3.0  $\mu$ l Reverse Primer (50 picomoles/ $\mu$ l)

2.5  $\mu$ l 25 mM MgCl<sub>2</sub>

1.0  $\mu$ l dNTPs

0.5  $\mu$ l Taq polymerase

3.0  $\mu$ l sample (~ 25 – 50 ng/ $\mu$ l)

PCR conditions for Full Length Template<sup>1</sup>:

1. 94°C 60 s
2. 58°C 90 s
3. 72°C 150 s
4. repeat steps 1 – 3 29 times
5. 72°C 15 min
6. 10°C until subsequent processing

*ndhF*

1x Recipe:

10.0  $\mu$ l H<sub>2</sub>O

2.5  $\mu$ l Buffer

2.5  $\mu$ l Taq Master (preheated to 65°C)

2.0  $\mu$ l Forward Primer (50 picomoles/ $\mu$ l)

2.0  $\mu$ l Reverse Primer (50 picomoles/ $\mu$ l)

1.5  $\mu$ l 25 mM MgCl<sub>2</sub>

1.0  $\mu$ l dNTPs

0.5  $\mu$ l Taq polymerase

3.0  $\mu$ l sample ( $\sim$  25 – 50 ng/ $\mu$ l)

PCR conditions for Full Length Template<sup>1</sup>:

1. 94°C 60 s
2. 43°C 90 s
3. 72°C 150 s
4. repeat 1 – 3 29 times
5. 72°C 15 min
6. 10°C until subsequent processing

<sup>1</sup>Annealing temperatures for other primer combinations were  $\sim$  5°C below the lower melting temperature of the primer pair.
